# Supplementary material
Source: PubMed Central journal article supplement (PMC2955134)
Supplement: 1009078107_pnas.201009078SI.pdf [file 1009078107_pnas.201009078SI.pdf]

# Supporting Information

Feng et al. 10.1073/pnas.1009078107

## SI Materials and Methods

**Gastrin Response to Bombesin.** After an overnight fast, mice were injected with bombesin (50  $\mu\text{g}/\text{kg}$  body weight; Bachem) as an i.p. bolus. Blood was sampled from the retro-orbital sinus before and 30–45 min after injection.

**Gastric Acid Secretion.** Acid output was measured by the pylorus ligation method (1). To determine the stimulated acid production, either gastrin-17 (1 mg/kg body weight; Sigma-Aldrich) or histamine dihydrochloride (10 mg/kg body weight; Sigma-Aldrich) was administered (subcutaneous bolus, 1% wt) immediately after pylorus ligation, and gastric acid was collected at 90 min. Gastric juice was titrated to pH 7.0 with 0.01 N NaOH and expressed as nEq  $\text{H}^+$  secreted per hour.

**Immunohistochemistry.** Stomachs were immersed in 4% (wt/vol) paraformaldehyde in PBS overnight, impregnated with 30% glucose, frozen in Tissue-tech, and sectioned (5  $\mu\text{m}$ ). Gastrin was detected using a rabbit anti-human gastrin primary antibody (1:500 dilution overnight; Dako Cytomation) and Alexa 594 goat

anti-rabbit secondary antibody. Parietal cell  $\text{H}^+/\text{K}^+$  ATPase was detected using a mouse monoclonal IgG against amino acid residues 1–13 or 15–28 located on the cytoplasmic side of the  $\beta$  subunit of  $\text{H}^+/\text{K}^+$  ATPase (1:1,000 dilution; Affinity BioReagents) and detected using Alexa 594 goat anti-mouse IgG (1:500 dilutions; Invitrogen). For double immunoreactivity to calcium-sensing receptor (CaR) and gastrin, stomachs were similarly fixed and paraffin-embedded; 5- $\mu\text{m}$  sections underwent antigen retrieval as described previously (2). The sections were blocked with 3% BSA in PBS blocking buffer for 30 min and then incubated with primary antibodies, including mouse monoclonal anti-human CaR directed at amino acids 214–235 of the extracellular domain of CaR (Affinity Bioreagents) at 1:500 dilution and rabbit polyclonal anti-human gastrin (Dako Cytomation) at 1:500 dilution for 48 h. The sections were then incubated with goat anti-mouse Alexa 488 (Molecular Probes) or goat anti-rabbit Alexa 594 (Molecular Probes) at a dilution of 1:1,000 for 1 h at room temperature. Specimens were analyzed using a Zeiss LSM510 confocal microscope.

1. Shay H, Sun DC, Gruenstein M (1954) A quantitative method for measuring spontaneous gastric secretion in the rat. *Gastroenterology* 26:906–913.

2. Goebel SU, et al. (2000) Expression of the calcium-sensing receptor in gastrinomas. *J Clin Endocrinol Metab* 85:4131–4137.

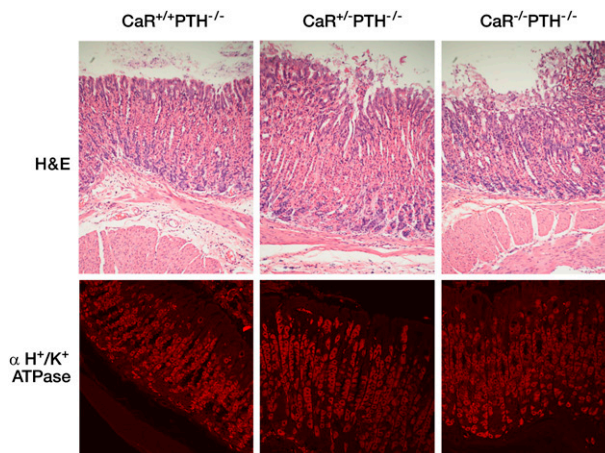

**Fig. S1.** The gastric bodies of CaR wild type (WT; CaR<sup>+/+</sup>PTH<sup>-/-</sup>), heterozygous (CaR<sup>+/-</sup>PTH<sup>-/-</sup>), and null (CaR<sup>-/-</sup>PTH<sup>-/-</sup>) littermates are histologically indistinguishable. *Upper* shows H&E, and *Lower* is  $\text{H}^+/\text{K}^+$  ATPase immunohistochemical stains of representative paraffin-embedded and frozen sections, respectively, from the gastric body of mice with the indicated genotypes.

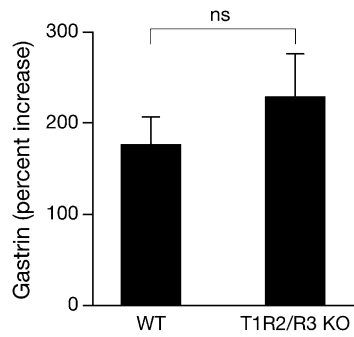

**Fig. S2.** The sweet T1R2/3 and amino acid T1R1/3 receptor heterodimers do not mediate peptone-stimulated gastrin release. Mice, with homozygous deletions of both T1R2 and T1R3 genes, and their WT littermates were fasted overnight and gavaged with a 1.5% body weight bolus of 8% peptone. Plasma gastrin levels were measured by RIA just before and 30 min after gavage. Results are expressed as the percent change (mean  $\pm$  SE) in secretion relative to basal secretion ( $n = 8$  mice). ns, nonsignificant.

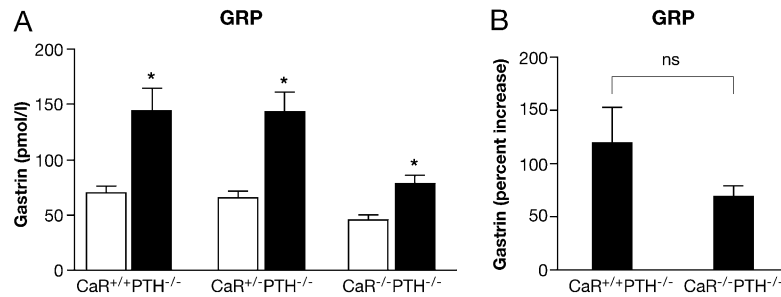

**Fig. S3.** Bombesin significantly stimulates gastrin secretion in CaR WT (CaR<sup>+/+</sup> PTH<sup>-/-</sup>) and null (CaR<sup>-/-</sup> PTH<sup>-/-</sup>) littermates. (A) Mice, fasted overnight, were s.c. injected the following morning with the amphibian homolog of gastrin-releasing peptide, bombesin (50  $\mu$ g/kg). Plasma gastrin was measured by RIA just before (open bars) and 30 min after injection (filled bar). (B) The same data are presented as percent increase over basal. \* $P < 0.05$ , stimulated vs. basal ( $n = 10$  mice). ns, nonsignificant.

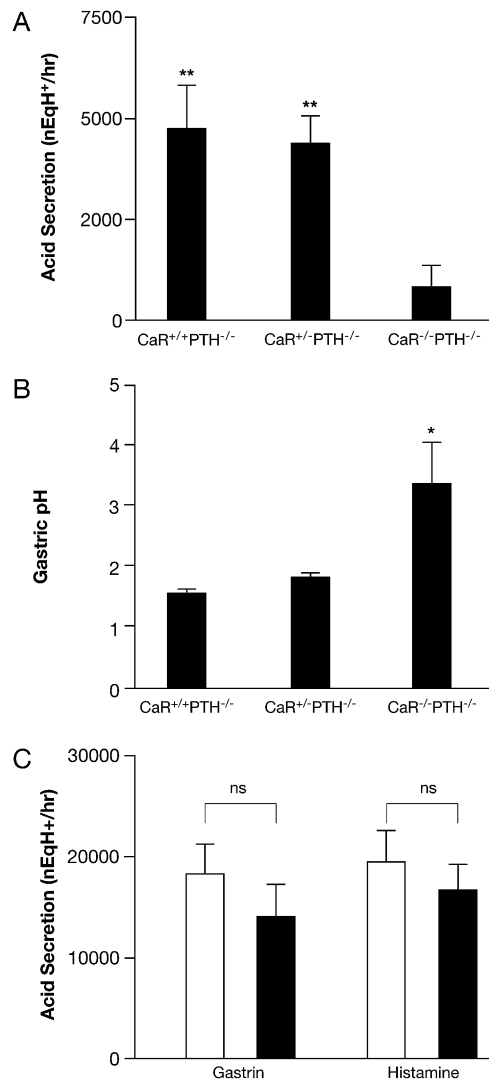

**Fig. 54.** CaR-null (CaR<sup>-/-</sup>PTH<sup>-/-</sup>) mice have markedly reduced basal gastric acid secretion and elevated gastric secretion pH compared with WT (CaR<sup>+/+</sup>PTH<sup>-/-</sup>) littermates but an equivalent gastric acid secretory response to gastrin and histamine. (A) Basal gastric acid secretion ( $n = 6$  mice). \*\* $P < 0.01$  relative to CaR-null (CaR<sup>-/-</sup>PTH<sup>-/-</sup>) littermates. (B) pH of luminal gastric secretion in pylorus-ligated stomachs from mice with the indicated CaR genotypes ( $n = 6$  mice). \* $P < 0.05$  relative to both CaR<sup>+/+</sup>PTH<sup>-/-</sup> and CaR<sup>+/-</sup>PTH<sup>-/-</sup> littermates. (C) Gastrin and histamine-stimulated gastric acid secretion in WT (CaR<sup>+/+</sup>PTH<sup>-/-</sup>; open bars) vs. null (CaR<sup>-/-</sup>PTH<sup>-/-</sup>; closed bars) littermates ( $n = 6$  mice). ns, nonsignificant.

**Table S1. High Ca<sup>2+</sup> diet does not significantly elevate plasma Ca<sup>2+</sup> regardless of CaR genotype**

| Diet                                                                            | Genotype                              |                                       |                                       |                                       |
|---------------------------------------------------------------------------------|---------------------------------------|---------------------------------------|---------------------------------------|---------------------------------------|
|                                                                                 | CaR <sup>-/-</sup> PTH <sup>-/-</sup> | CaR <sup>+/-</sup> PTH <sup>-/-</sup> | CaR <sup>+/+</sup> PTH <sup>-/-</sup> | CaR <sup>+/+</sup> PTH <sup>+/+</sup> |
| Normal Ca <sup>2+</sup> diet (rat chow) Ca <sup>2+</sup> (total plasma, mmol/L) | 1.66 ± 0.04                           | 1.64 ± 0.05                           | 1.72 ± 0.07                           | 2.35 ± 0.02*                          |
| High Ca <sup>2+</sup> diet Ca <sup>2+</sup> (total plasma, mmol/L)              | 1.76 ± 0.09                           | 1.68 ± 0.05                           | 1.71 ± 0.05                           | NA                                    |
| Fasting gastrin (pmol/L)                                                        | 43 ± 5 <sup>†</sup>                   | 86 ± 8                                | 63 ± 17                               | 64 ± 9                                |
| Meal-stimulated gastrin (pmol/L)                                                | 44 ± 5 <sup>†</sup>                   | 161 ± 24                              | 175 ± 21                              | 180 ± 85                              |

The CaR-null (CaR<sup>-/-</sup>PTH<sup>-/-</sup>) genotype but not total plasma Ca<sup>2+</sup> determines the gastrin response to meal stimulation. Mice were maintained on a high Ca<sup>2+</sup> and vitamin D diet for 2 mo. Meal stimulation consisted of ad libitum normal rat chow ( $n = 4$  mice/group; data are presented as the mean ± SE).

\* $P < 0.01$ ; CaR<sup>+/+</sup>PTH<sup>+/+</sup> vs. CaR<sup>+/+</sup>PTH<sup>-/-</sup>, CaR<sup>+/-</sup>PTH<sup>-/-</sup>, or CaR<sup>-/-</sup>PTH<sup>-/-</sup>.

<sup>†</sup> $P < 0.01$ ; CaR<sup>-/-</sup>PTH<sup>-/-</sup> vs. CaR<sup>+/+</sup>PTH<sup>+/+</sup>, CaR<sup>+/+</sup>PTH<sup>-/-</sup>, or CaR<sup>+/-</sup>PTH<sup>-/-</sup>.
